# Supplementary material
Source: PubMed Central journal article supplement (PMC6258279)
Supplement: NIHMS1505102-supplement-1.pdf [file NIHMS1505102-supplement-1.pdf]

Supplement for:

**Primate immunodeficiency virus Vpx and Vpr counteract transcriptional repression of proviruses by the HUSH complex**

Leonid Yurkovetskiy, Mehmet Hakan Guney, Kyusik Kim, Shih Lin Goh, Sean McCauley, Ann Dauphin, William Diehl, and Jeremy Luban

Including:

**Supplementary Figures 1, 2, 3, 4, and 5, with corresponding Figure Legends.**

**Supplementary Table 1**

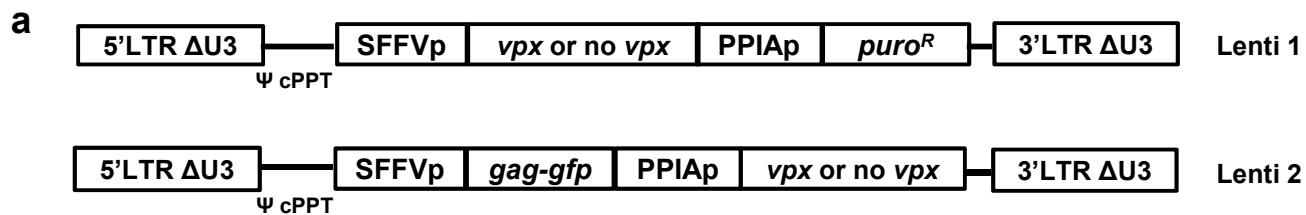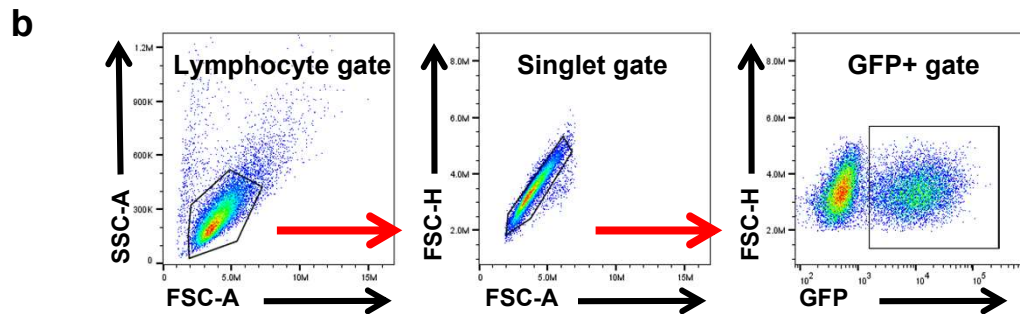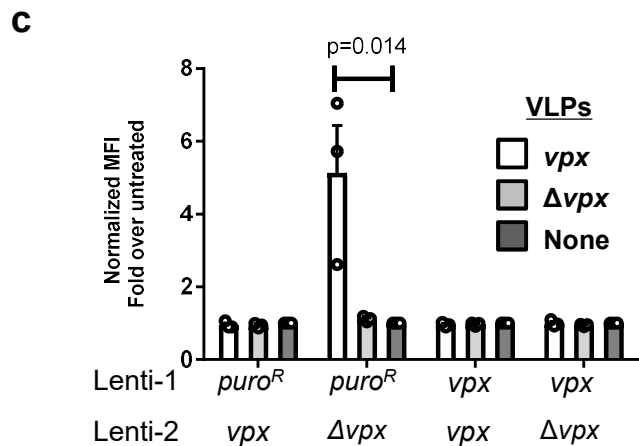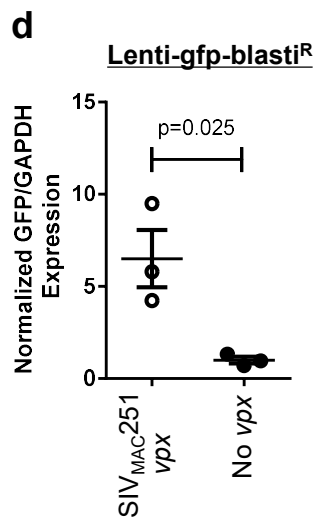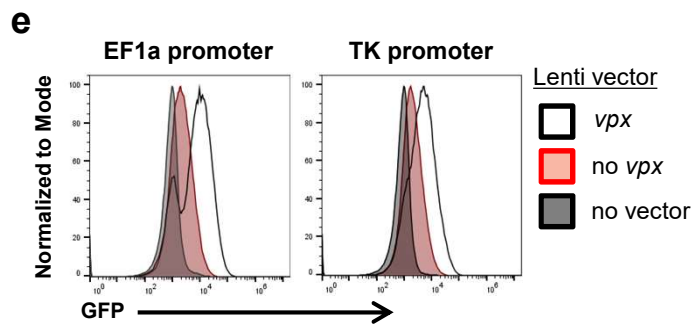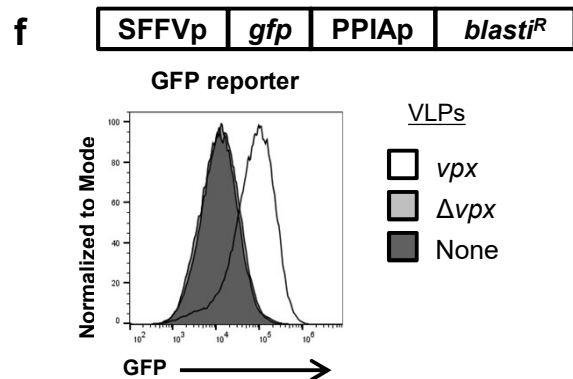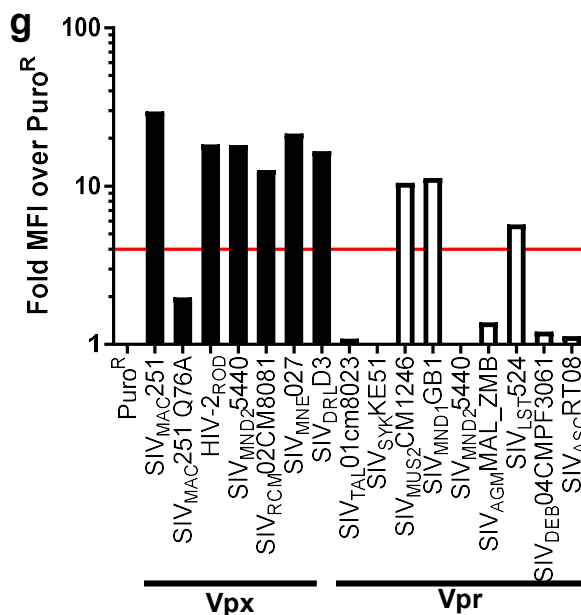

**Supplementary Figure 1. Transcriptional activation of lentivector reporter genes by *vpx* and *vpr*.**

**a**, Schematic of *vpx*<sup>+</sup> and no *vpx* versions of Lenti 1 and Lenti 2 vectors used in Figs 1 and 2. **b**, Representative live, singlet, lymphoid, GFP<sup>+</sup> flow cytometry gating strategy. **c**, Quantification of results from Fig 1b. Jurkat-*vpx* or Jurkat-*puro*<sup>R</sup> transduced with Lenti-2-*vpx*, or Lenti-2-no *vpx*, were treated with Vpx<sup>+</sup> VLPs, ΔVpx VLPs, or no VLPs, and analyzed three days later. MFI was normalized for each group of VLP treated cells to untreated samples; (mean ± S.E.M., n=3 independent experiments), significance determined by 1-way ANOVA with Dunnett's post-test comparing treated to untreated samples in each group. **d**, Representative qPCR analysis of *gfp* expression after Lenti-*gfp-blasti*<sup>R</sup> cells were transduced with SIV<sub>MAC251</sub> Vpx or empty vectors (mean ± S.E.M., n=3 replicates), significance determined by unpaired two-tailed *t* test **e**, Jurkat cells were transduced with Lenti-*gfp-blasti*<sup>R</sup> with gag-GFP driven by EF1α or TK promoters and Blast<sup>R</sup> driven by CypA promoter. Three days after selection cells were transduced with SIV<sub>MAC251</sub> Vpx (white) or control *puro*<sup>R</sup> (red) vectors and selected with blasticidin. Untransduced cells are shown in grey (n=3). **f**, Jurkat cells were transduced with Lenti-*gfp-blasti*<sup>R</sup> with untagged GFP driven by SFFV promoter. Three days after selection cells were treated with Vpx<sup>+</sup> VLPs, ΔVpx VLPs, or no VLPs and analyzed by FACS for GFP expression (n=3). **g**, Transactivation of Lenti-*gfp-blasti*<sup>R</sup> reporter cells by the indicated *vpx* and *vpr* expression lentivectors. Red line indicates 4-fold transactivation, which was used as a cutoff for activity.

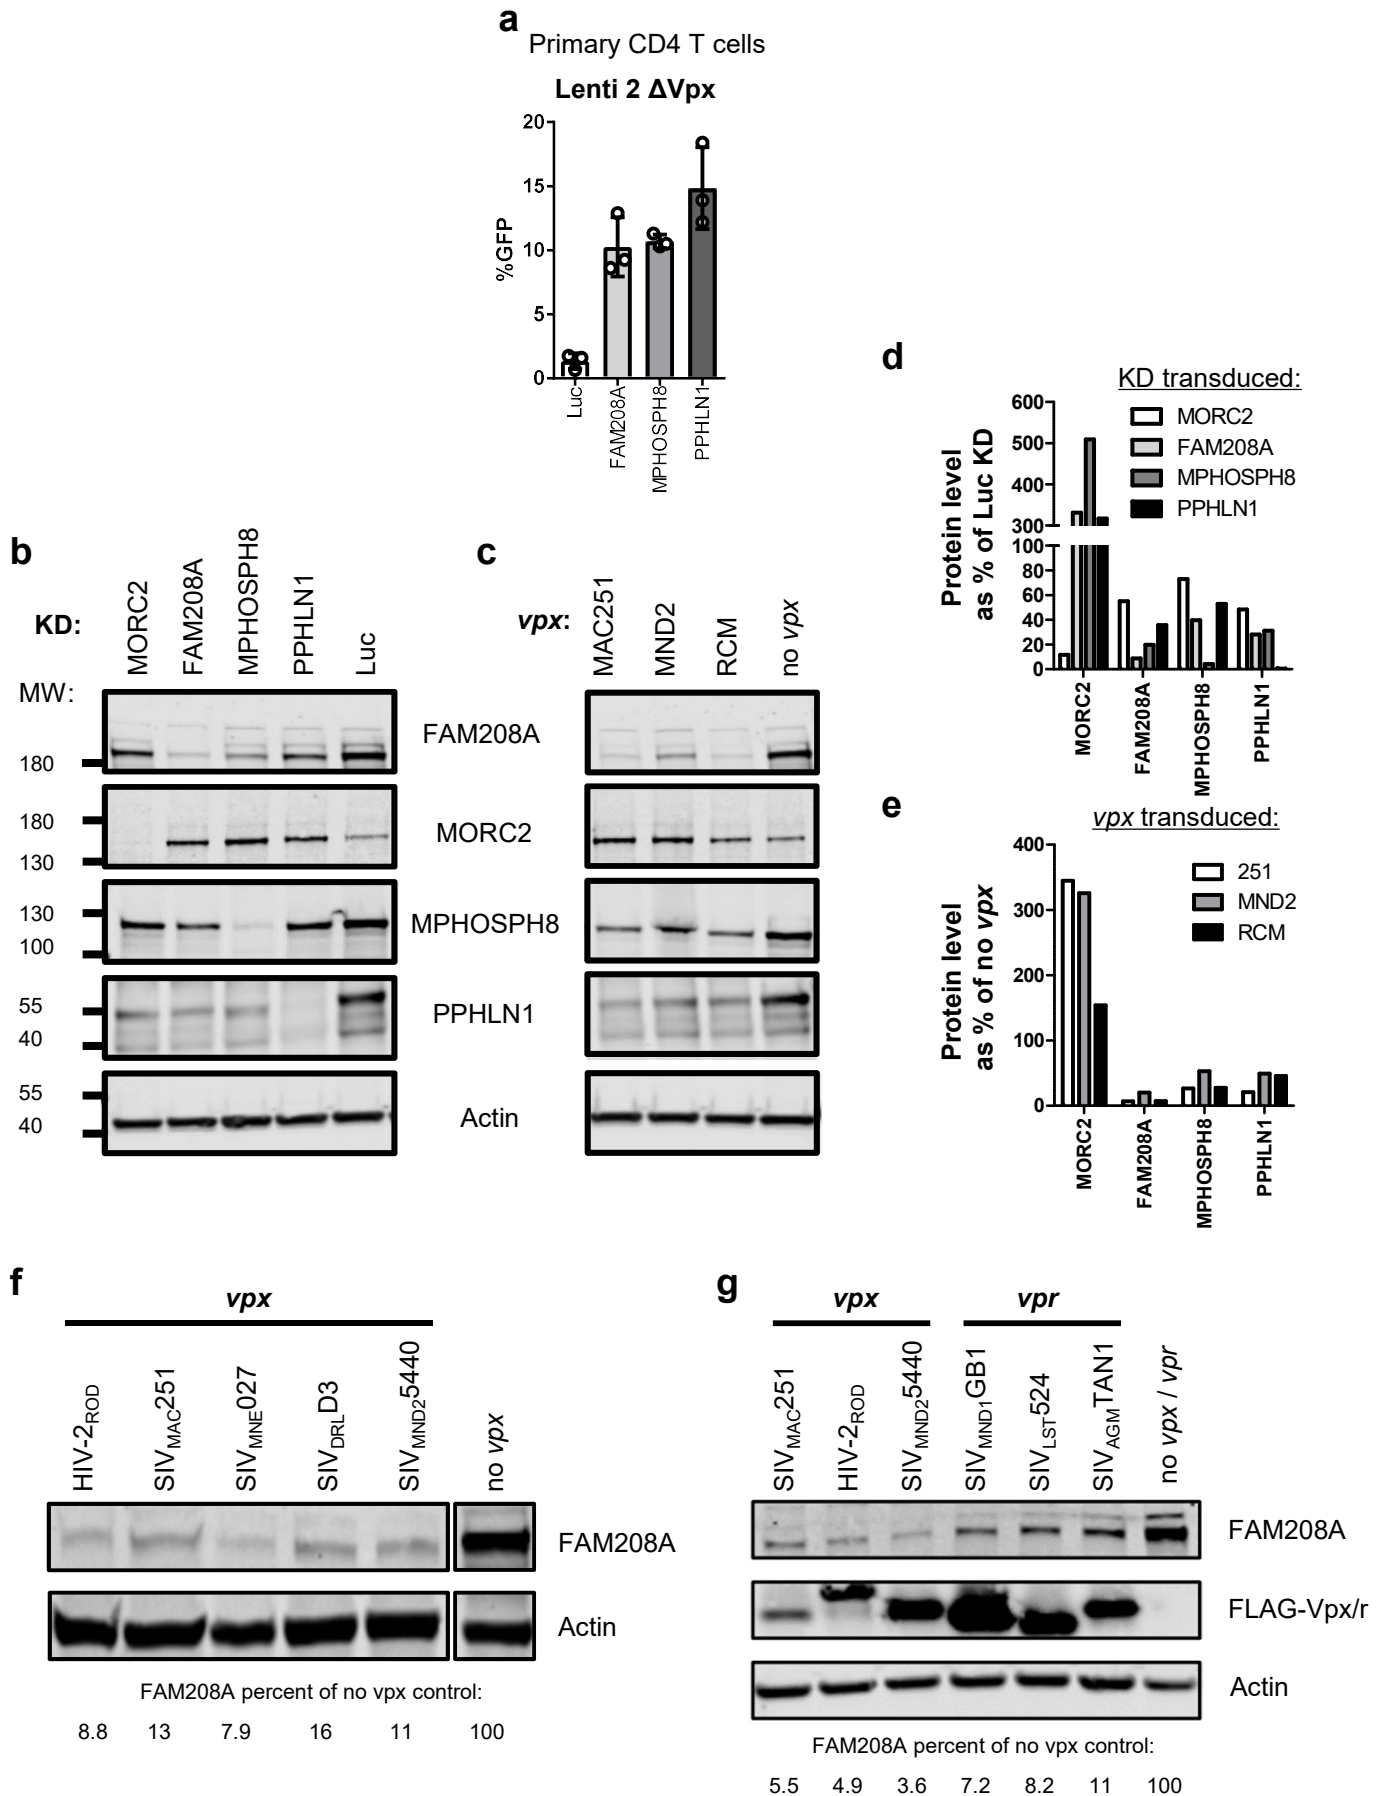

**Supplementary Figure 2. HUSH components inhibit provirus expression in primary CD4+ T cells; Vpx and Vpr from multiple lentiviral species deplete FAM208A.**

**a**, Quantification of results from Fig. 2d. CD4<sup>+</sup> T cells were positively selected with magnetic beads, activated for 3 days with PHA, transduced with the indicated shRNA-puro<sup>R</sup> knockdown or control vectors, and selected with puromycin. Cells were then transduced with a lenti-gfp vector in the absence of *vpx*, and analyzed for GFP expression two weeks later (mean  $\pm$  S.E.M., n=3 donors). **b**, Immunoblot analysis for components of the HUSH complex in Jurkat cells expressing shRNA constructs against HUSH complex and MORC2 (n=3). **c**, Immunoblot analysis of Jurkat lines transduced to express *vpx* from SIV<sub>MAC</sub>251, SIV<sub>RCM</sub>NG411, SIV<sub>MND2</sub>5440, or control (n=3). **d**, Levels of HUSH components and MORC2 in (**b**) presented as shRNA treated condition relative to control (n=3). **e**, Levels of HUSH components and MORC2 in (**c**) presented as *vpx* treated condition relative to control (n=3). **f**, Immunoblotting for FAM208A and Actin using lysate from Jurkat cells stably transduced with lentivectors producing the indicated Vpx proteins (n=3). **g**, Immunoblotting for FAM208A, FLAG-Vpx, and FLAG-Vpr in Jurkat cells stably transduced with lentivectors expressing the indicated 3xFLAG tagged Vpx and Vpr constructs.

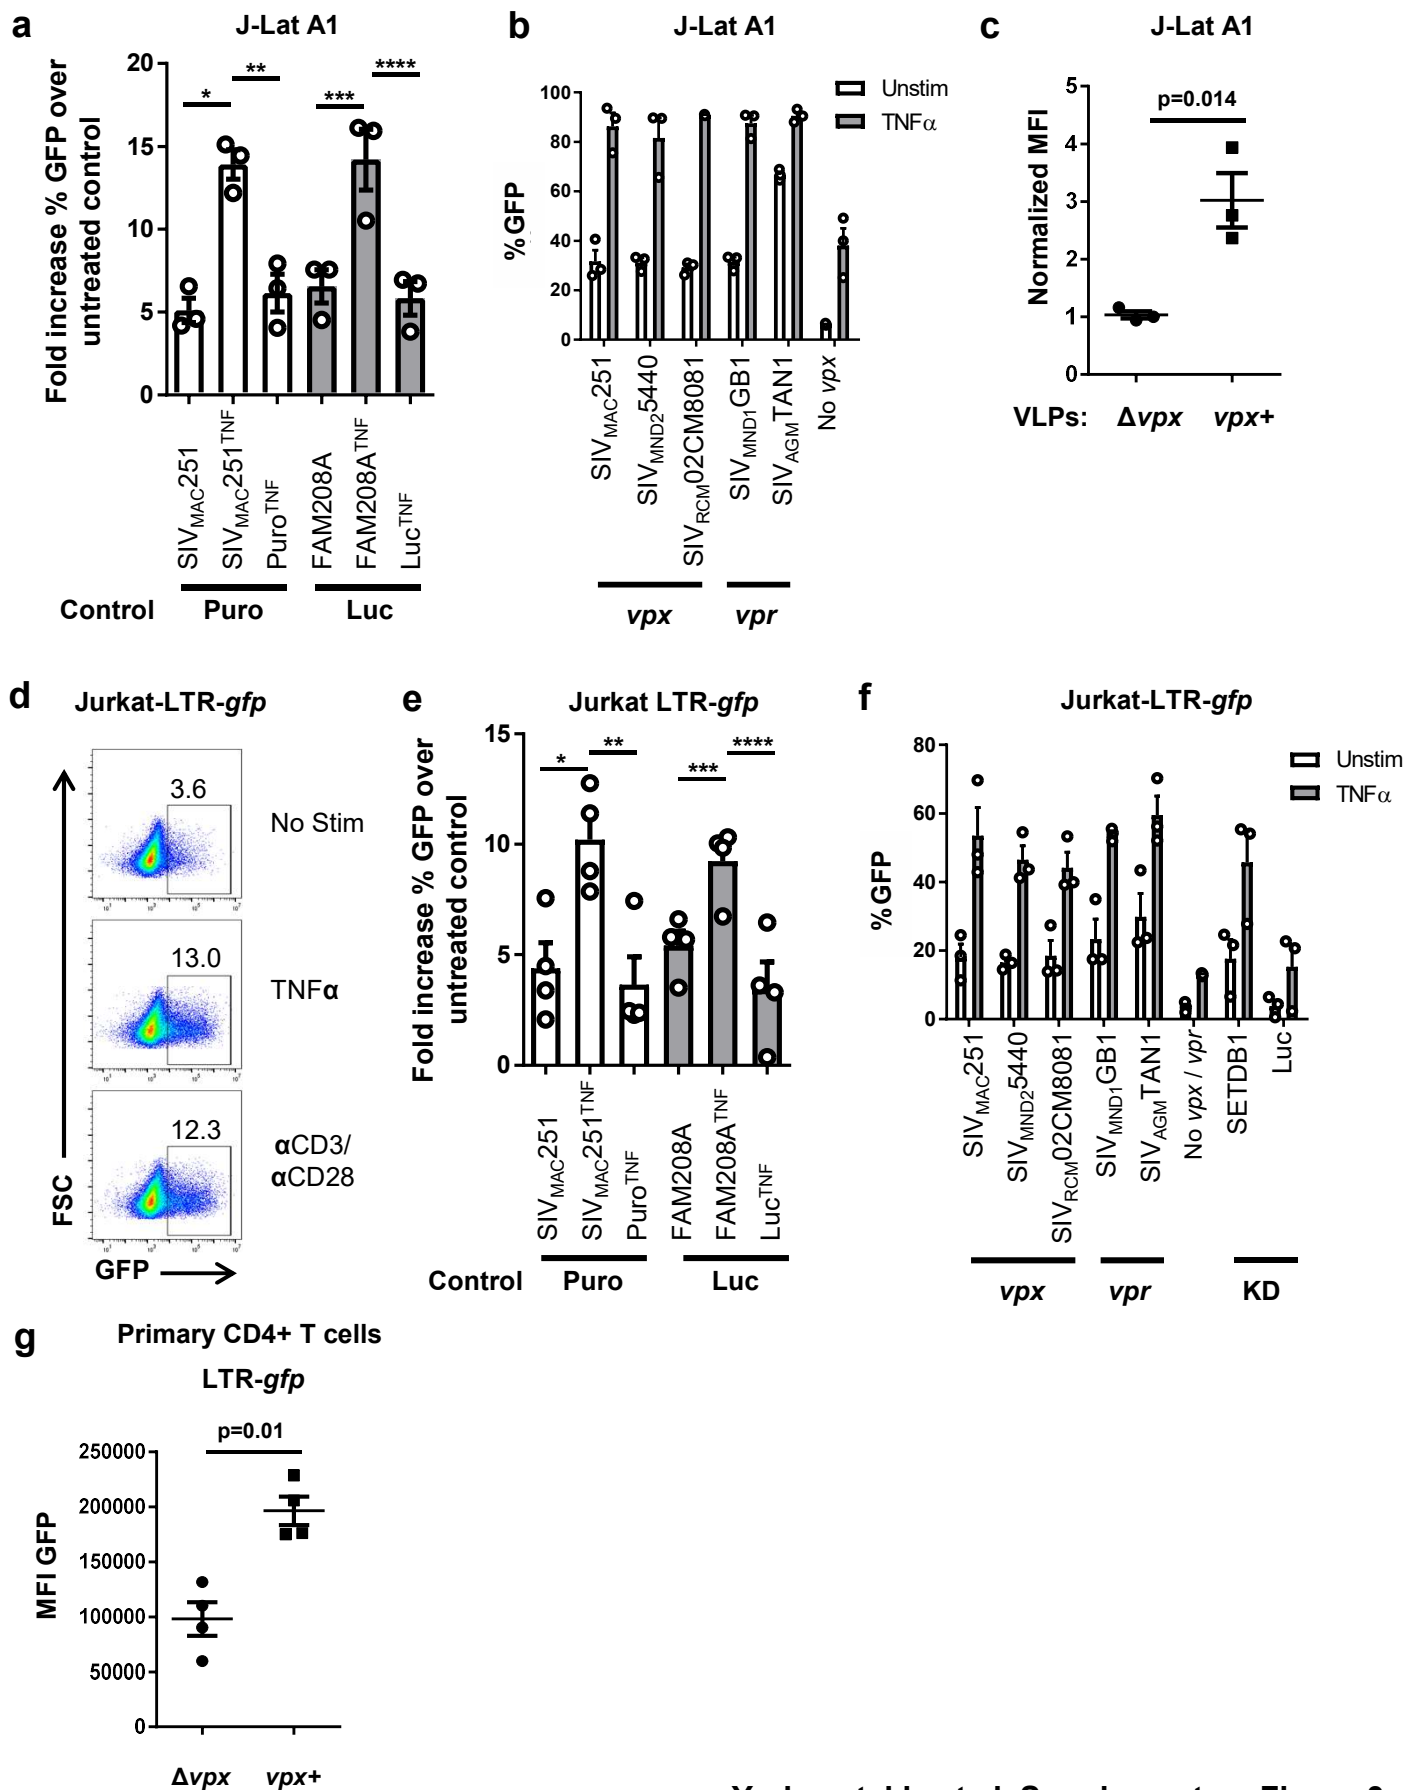

### Supplementary Figure 3. Expression from the HIV-1 LTR is activated by diverse Vpx and Vpr proteins

**a**, Reanalysis of J-Lat A1 cells from Fig. 3c. J-Lat A1 cells were transduced with SIV<sub>MAC251</sub> Vpx or control, or with lentivectors expressing shRNA targeting FAM208A or Luc control and stimulated with 10 ng/ml TNF $\alpha$ . Data is presented as fold increase of GFP<sup>+</sup> cells compared to untreated control cells. Expression of Vpx or KD of FAM208A alone led to comparable increase in GFP expression and addition of TNF $\alpha$  led to an additive effect compared to single treatments. (mean  $\pm$  S.E.M., n=3) \*,  $P=0.0042$ , \*\*,  $P=0.0080$ , \*\*\*,  $P=0.0073$ , \*\*\*\*,  $P=0.047$ , significance was determined by 1-way ANOVA with Tukey's post-test. **b**, J-Lat A1 cells were transduced with Lenti 1 encoding Vpx from SIV<sub>MAC251</sub>, SIV<sub>RCM02CM8081</sub>, or SIV<sub>MND25440</sub>, Vpr from SIV<sub>MND1GB1</sub>, or SIV<sub>AGMTAN1</sub>, or control no vpx Lenti 1. Transduced cells were selected with puromycin, activated for 24 hrs with 10 ng/ml of TNF $\alpha$ , and GFP was assessed by flow cytometry (mean  $\pm$  S.E.M., n=3) **c**, J-Lat A1 cells were treated with vpx<sup>+</sup> or  $\Delta$ vpx SIV3<sup>+</sup> vlps for three days and analyzed for GFP expression. Fold MFI change relative to  $\Delta$ vpx treated cells is presented (mean  $\pm$  S.E.M., n=3), significance was determined by two-tailed unpaired *t* test. **d**, Jurkat LTR-*gfp* cells were activated for 24 hrs with either 10 ng/ml TNF $\alpha$  or 1  $\mu$ g/ml each of soluble  $\alpha$ -CD3 and  $\alpha$ -CD28 antibodies. GFP was then assessed by flow cytometry. Representative of three independent experiments. **e**, Reanalysis of Jurkat-LTR-*gfp* cells from Fig. 3f. J-Lat A1 cells were transduced with SIV<sub>MAC251</sub> Vpx or control, or with lentivectors expressing shRNA targeting FAM208A or Luc control and stimulated with 10 ng/ml TNF $\alpha$ . Data is presented as fold increase of GFP<sup>+</sup> cells compared to untreated control cells. Expression of Vpx or KD of FAM208A alone led to comparable increase in GFP expression and addition of TNF $\alpha$  led to an additive effect compared to single treatments (mean  $\pm$  S.E.M., n=4). \*,  $P=0.018$ , \*\*,  $P=0.0092$ , \*\*\*,  $P=0.045$ , \*\*\*\*,  $P=0.0049$ , significance was determined by 1-way ANOVA with Tukey's post-test. **f**, Jurkat LTR-*gfp* cells were transduced with Lenti 1 vector

encoding Vpx from SIV<sub>MAC251</sub>, or SIV<sub>RCM02CM808</sub>, or SIV<sub>MND25440</sub>, Vpr from SIV<sub>MND1GB1</sub>, or SIV<sub>AGM</sub>TAN1, control no vpx Lenti 1. Jurkat LTR-*gfp* cells were also transduced with lentivectors expressing shRNA targeting SETDB1 or Luc control. Cells were then selected with puromycin, and activated for 24 hrs with 10 ng/ml TNF $\alpha$ . GFP expression was assessed by flow cytometry (mean  $\pm$  S.E.M., n=3) **g**, Primary CD4<sup>+</sup> T cells were activated for 3 days with PHA and then transduced with LTR-*gfp* construct. Cells were cultured for one week after initial transduction followed by transduction with either  $\Delta$ vpr  $\Delta$ vpx or  $\Delta$ vpr vpx<sup>+</sup> VSV-g psuedotyped SIV-luc virus and MFI of the GFP<sup>+</sup> population was assessed by flow cytometry 3 days later (mean  $\pm$  S.E.M., n=4 independent donors), significance was determined by two-tailed paired *t* test.



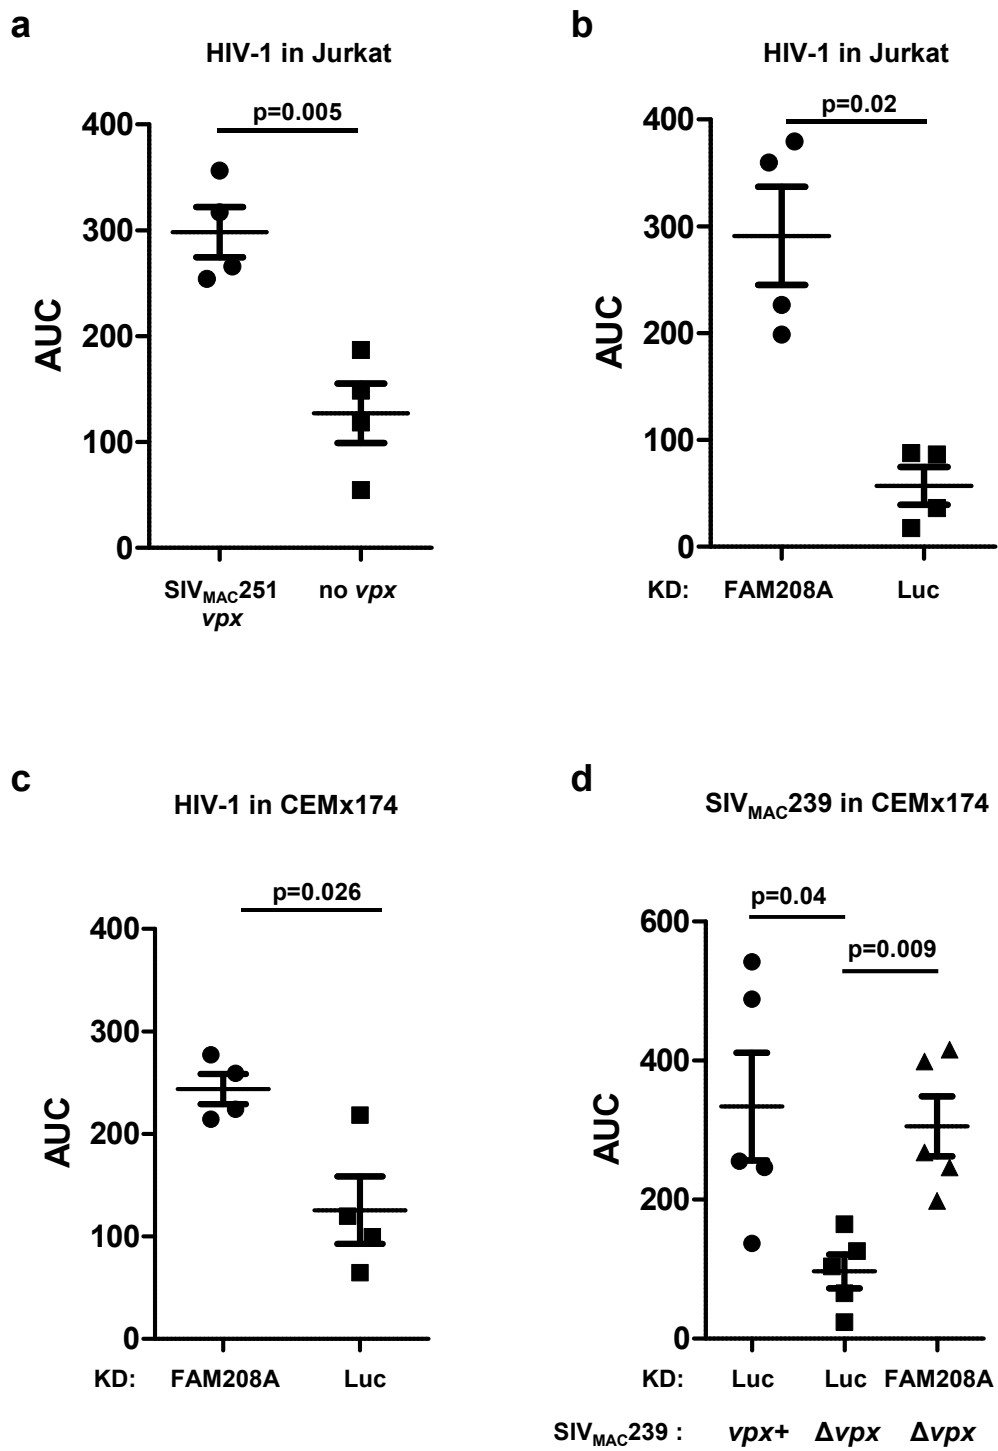

Yurkovetskiy et al, Supplementary Figure 4

**Supplementary Figure 4. Quantification of HIV-1 and SIV spreading infections in Jurkat and CEMx174 cells.**

**a,b**, Quantification of results from Figs 4a,b. Replication of HIV-1-ZsGreen in Jurkat cells transduced with SIV<sub>MAC251</sub> vpx or control (**a**), or with lentivectors expressing shRNA targeting FAM208A or Luc control (**b**). Replication kinetics was measured by flow cytometry for ZsGreen<sup>+</sup> cells. Data from biological replicates was normalized to maximum infection observed in that experiment and the area under the curve was calculated for statistical comparison (mean ± S.E.M., n=4 independent experiments), significance was determined by two-tailed paired *t* test.

**c,d**, Quantification of results from Figs 4c,d. Spreading infection of HIV-1-ZsGreen (**c**) and SIV<sub>MAC239</sub> or SIV<sub>MAC239</sub>Δvpx (**d**) in CEMx174 cells transduced with FAM208A or Luc control shRNA. Spread of HIV-1-ZsGreen was assessed by flow cytometry as in (**a**), while spread of SIV<sub>MAC239</sub> (**d**) was assessed by measuring the accumulation of reverse transcriptase (RT) activity in the supernatant. Data from individual replicates was normalized to maximum infection observed in that experiment and the area under the curve was calculated for statistical comparison (mean ± S.E.M., n=4 (**c**) n=5 (**d**) independent experiments). For (**c**), significance was determined by two-tailed paired *t* test. For (**d**), significance was determined by 1-way ANOVA with Dunnett's post-test compared to Luc KD cells infected with SIV<sub>MAC239</sub>Δvpx.

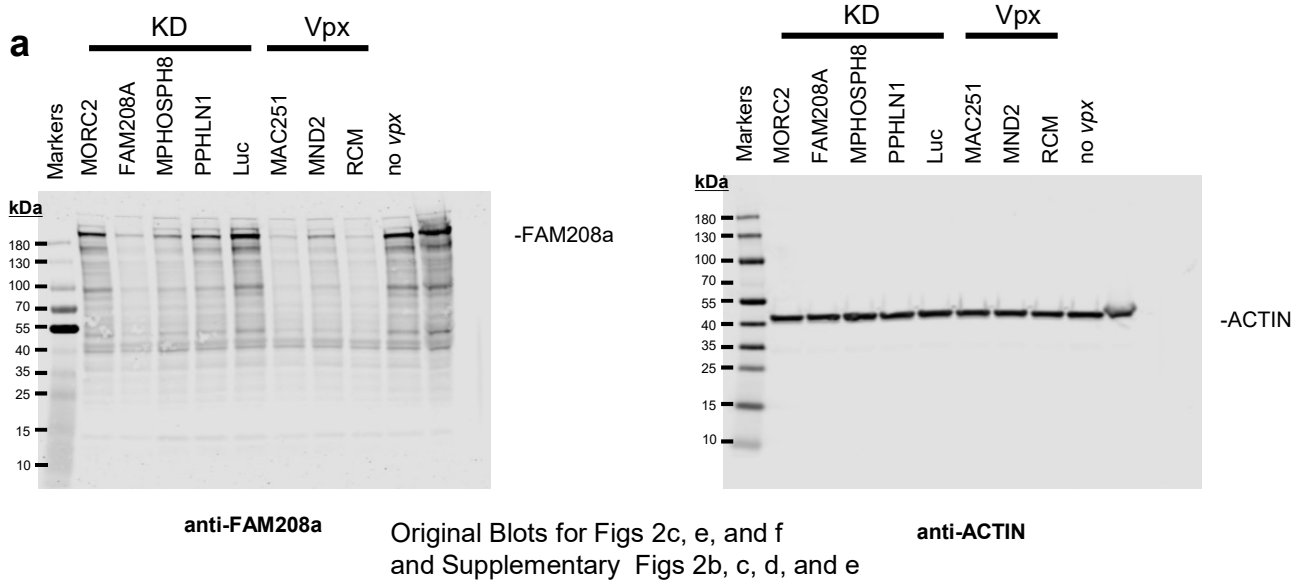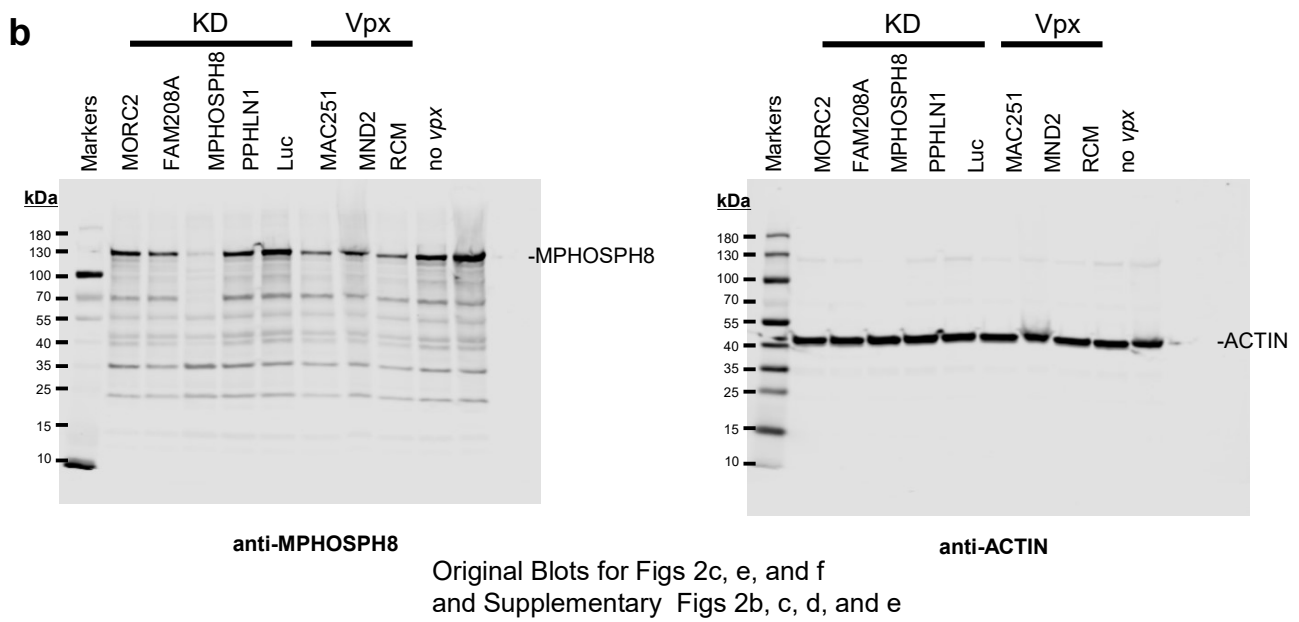

**c**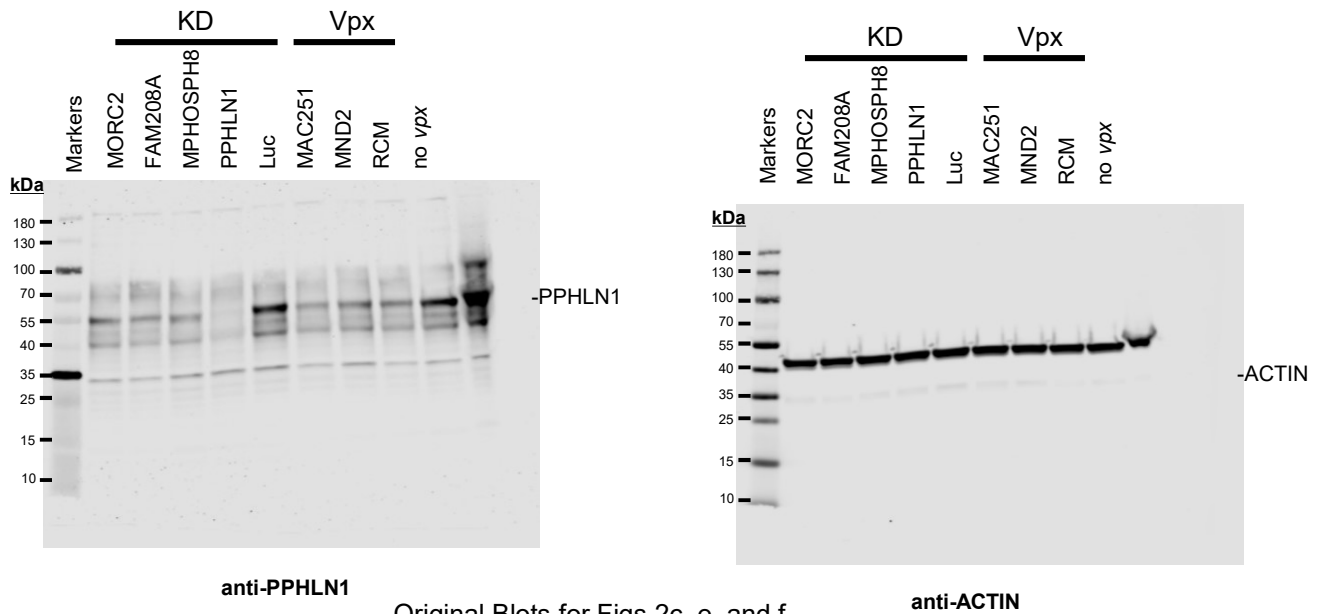

Original Blots for Figs 2c, e, and f  
and Supplementary Figs 2b, c, d, and e

**d**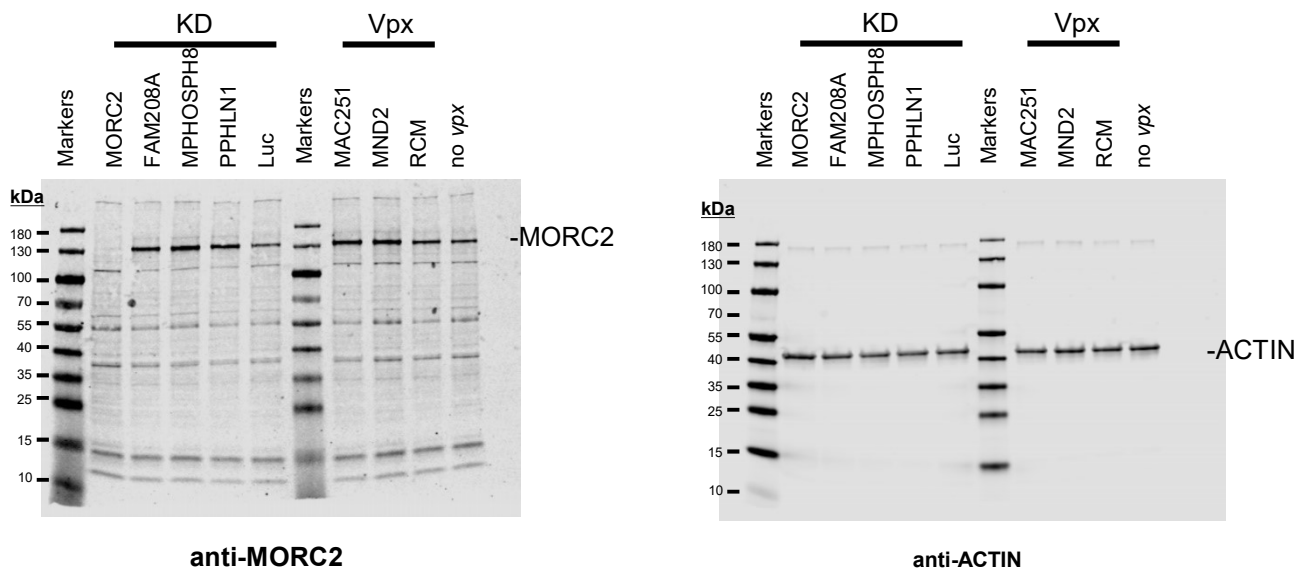

Original Blots for Figs 2c, e, and f  
and Supplementary Figs 2b, c, d, and e

**e**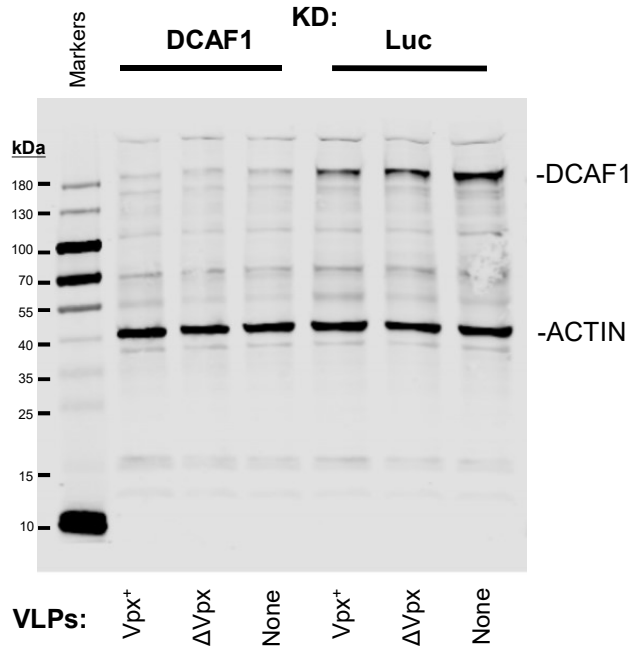

anti-DCAF1  
anti-ACTIN

**f**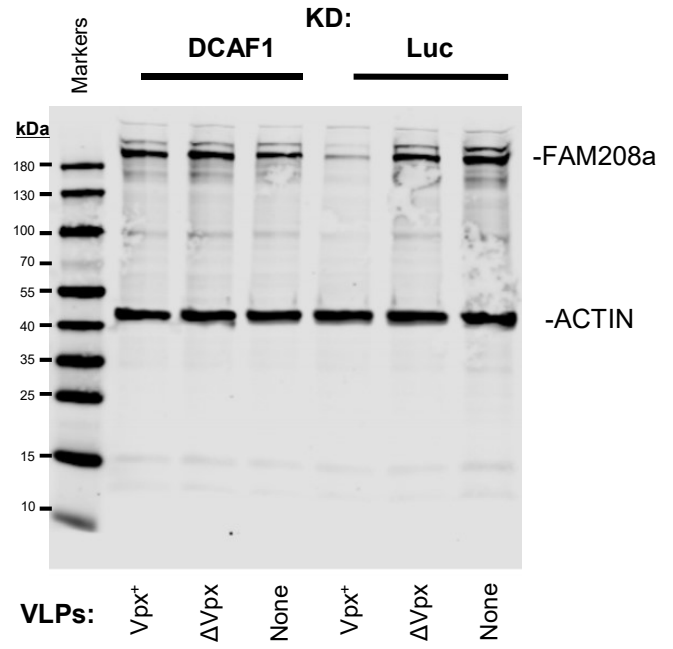

anti-FAM208a  
anti-ACTIN

Original Blots for Fig. 2g

**g**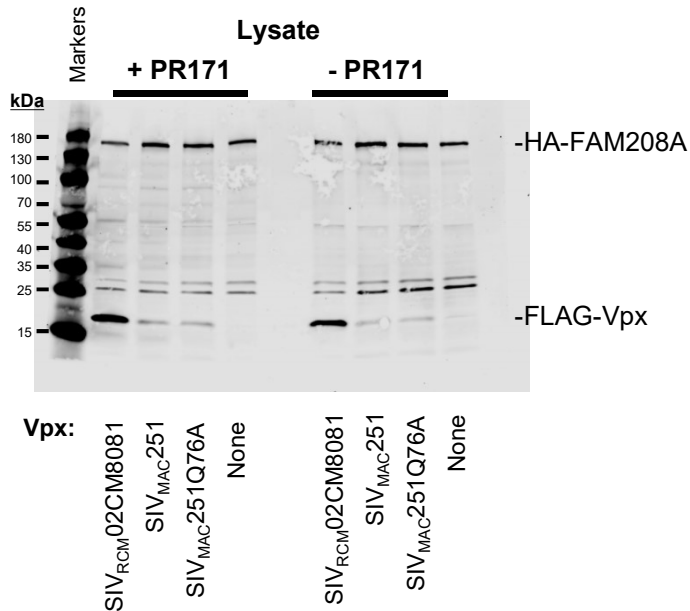

anti-HA-FAM208A  
anti-FLAG-Vpx

Original Blots for Fig. 2h

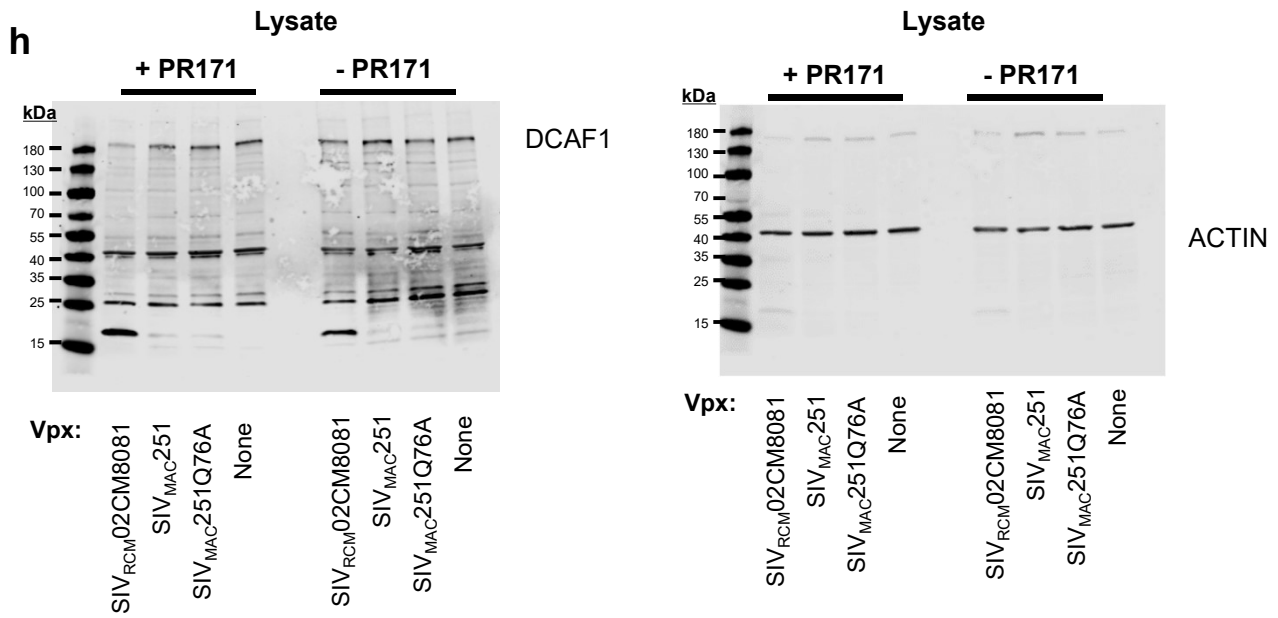

Original Blots for Fig. 2h

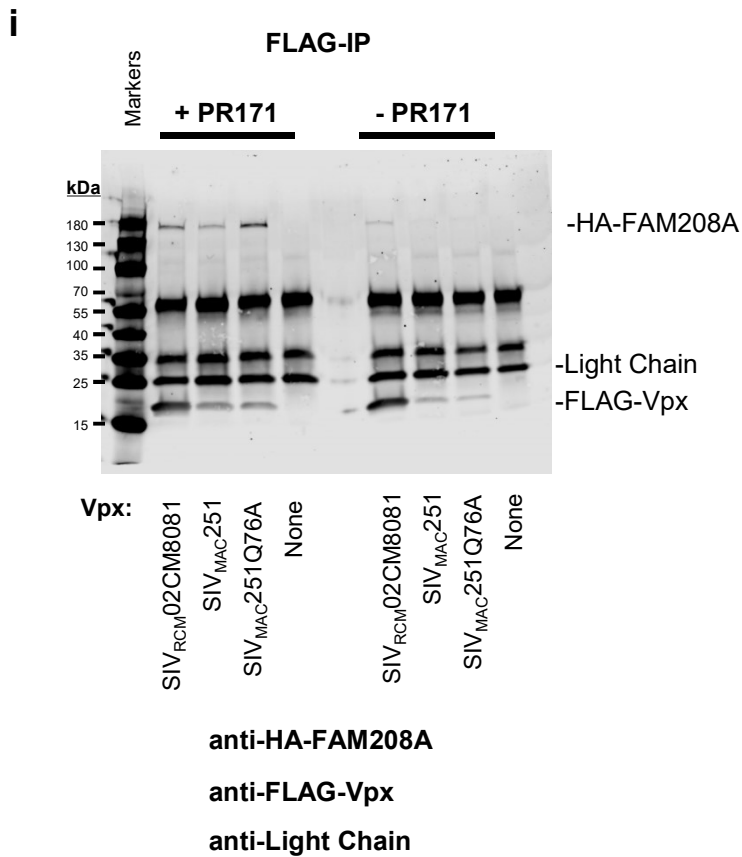

Original Blots for Fig. 2h

**j**

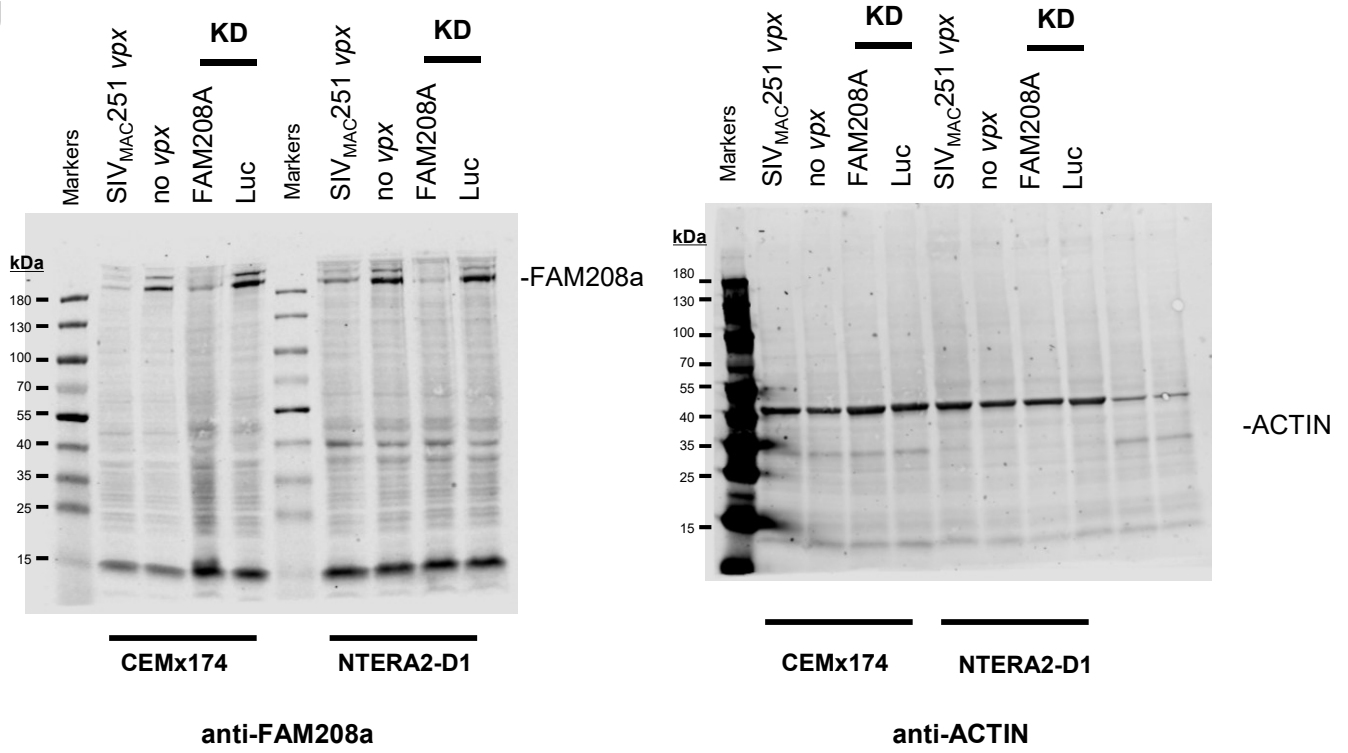

Original Blots for Fig. 4e

**k**

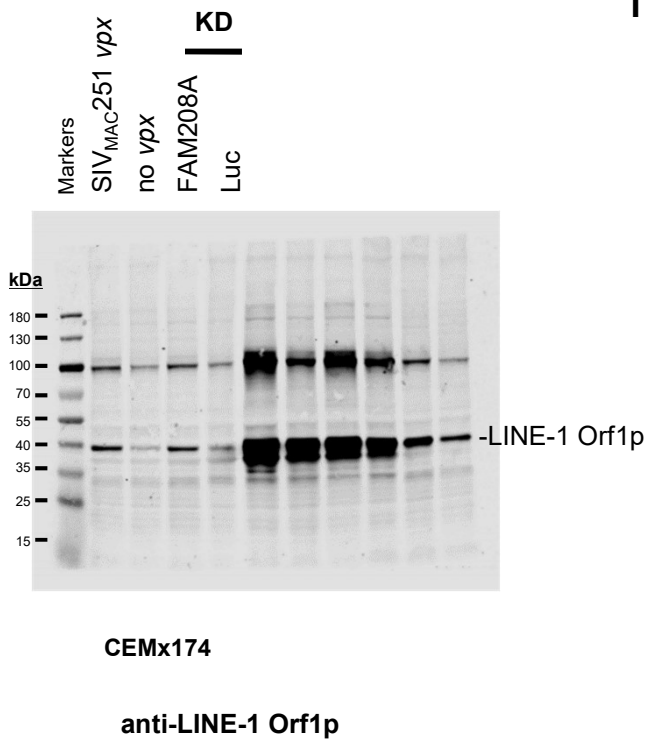

Original Blots for Fig. 4e

**l**

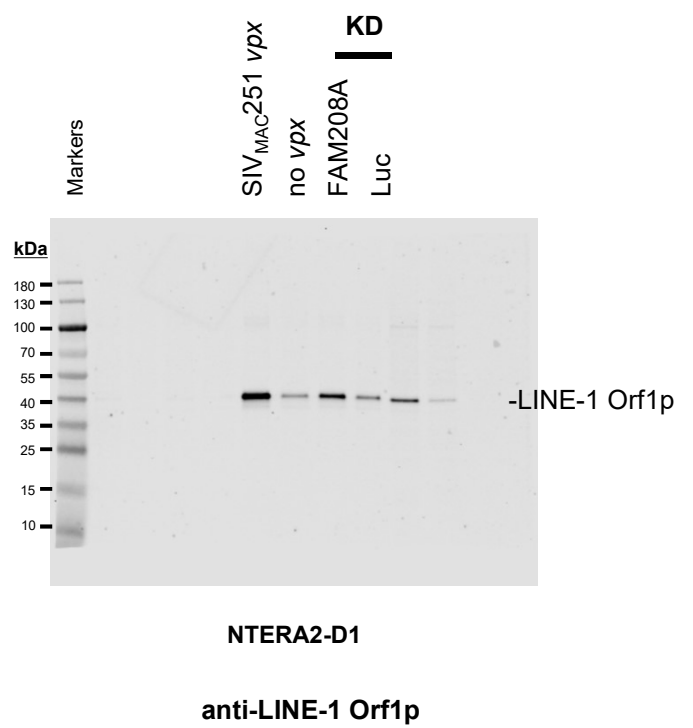

Original Blots for Fig. 4e

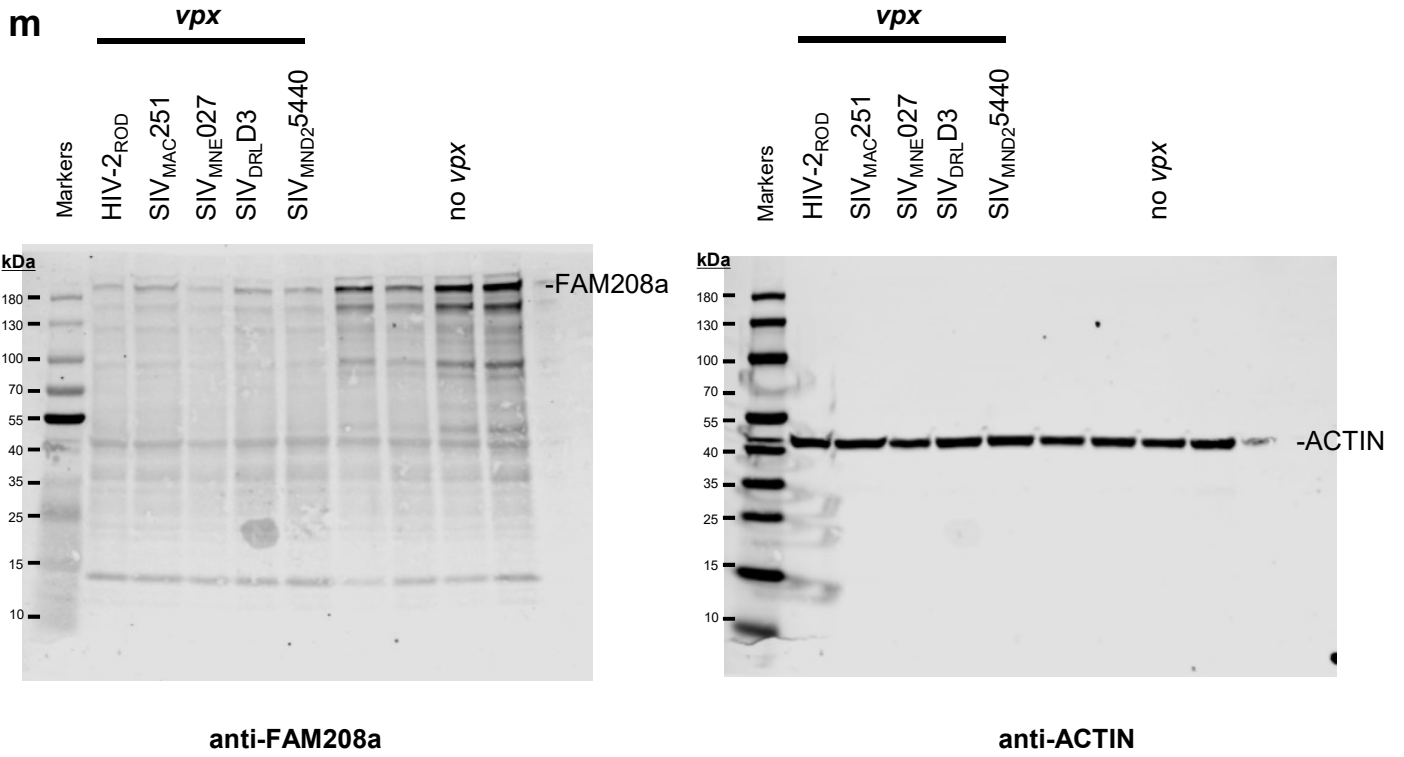

Original Blots for Supplementary Fig. 2f

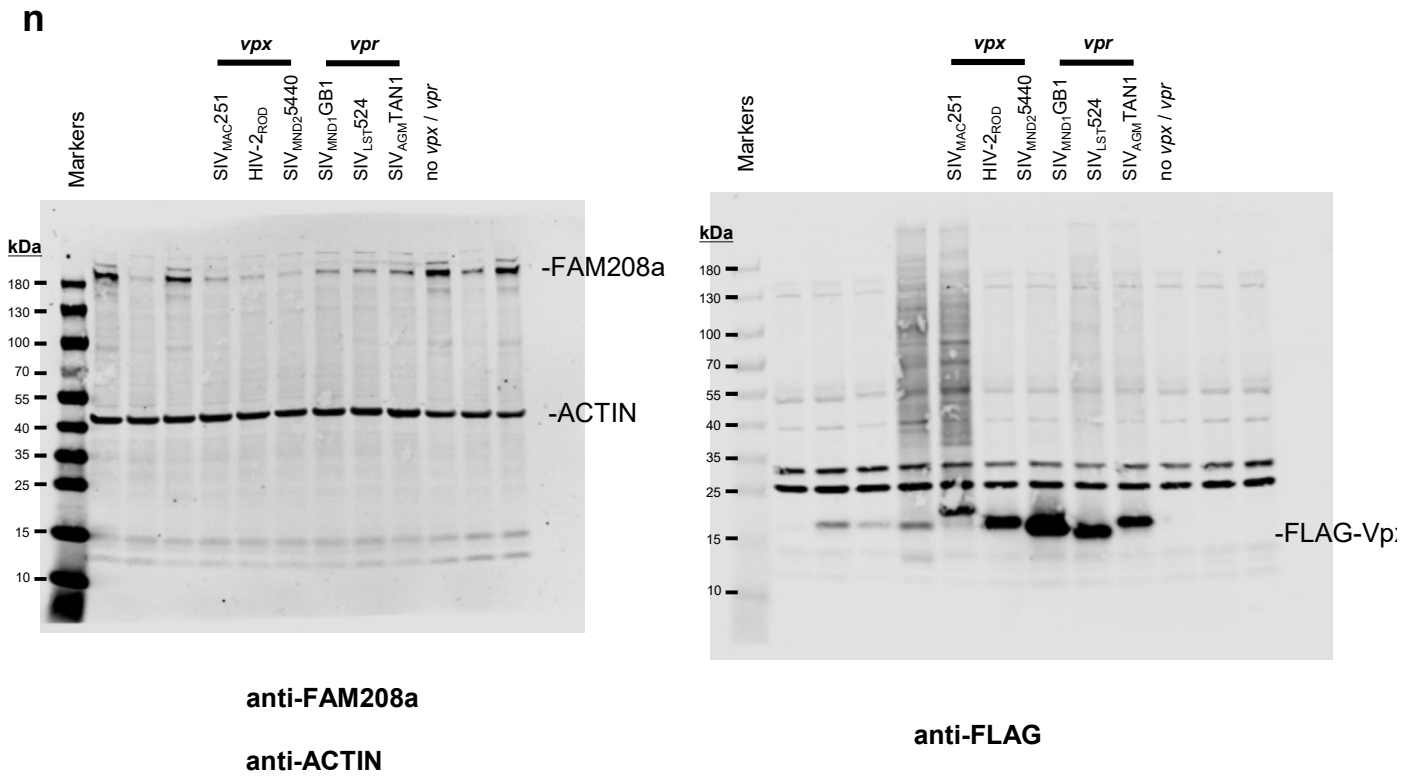

Original Blots for Supplementary Fig. 2g



### **Supplementary Figure 5. Original Western blots.**

(a), Original blot staining FAM208a and ACTIN for Figs 2c, e, and f and Supplementary Figs 2b, c, d, and e. (b), Original blot staining MPHOSPH8 and ACTIN for Figs 2c, e, and f and Supplementary Figs 2b, c, d, and e. (c), Original blot staining PPHLN1 and ACTIN for Figs 2c, e, and f and Supplementary Figs 2b, c, d, and e. (d), Original blot staining MORC2 and ACTIN for Figs 2c, e, and f and Supplementary Figs 2b, c, d, and e. (e), Original blot staining DCAF1 and ACTIN for Fig. 2g. (f), Original blot staining FAM208a and ACTIN for Fig. 2g. (g), Original blot for Fig. 2h staining lysates for HA-FAM208a and FLAG-Vpx. (h), Original blot for Fig. 2h staining lysates for DCAF1 and ACTIN. (i), Original blot for Fig. 2h staining FLAG-IP for HA-FAM208a, FLAG-Vpx, and Light Chain. (j), Original blot staining FAM208a and ACTIN for Fig. 4e. (k), Original blot staining CEMx174 lysates for LINE-1 Orf1p for Fig. 4e. (l), Original blot staining NTERA2-D1 lysates for LINE-1 Orf1p for Fig. 4e. (m), Original blot staining FAM208a and ACTIN for Fig. 4e. (n), Original blot staining FAM208a and ACTIN for Supplementary Fig. 2f. (o), Original blot staining FAM208a, FLAG-Vpx/r and ACTIN for Supplementary Fig. 2f.

**Supplementary Table 1. Plasmids used in this study.**

| Plasmid Name                   | Purpose                                   | Notes                                                                                                                                                                                                                                                                           | Source                         |
|--------------------------------|-------------------------------------------|---------------------------------------------------------------------------------------------------------------------------------------------------------------------------------------------------------------------------------------------------------------------------------|--------------------------------|
| HIV1-ZsGreen                   | Replication competent HIV-1               | HIV-1 NL4-3 in pBluescript with flanking host sequences deleted and intact <i>env</i> . ZsGreen in place of <i>nef</i>                                                                                                                                                          | Gift from Dr. Massimo Pizzato  |
| SIV <sub>mac239</sub> SpX      | Replication competent SIV                 | Molecular clone of SIV <sub>MAC239</sub> proviral DNA                                                                                                                                                                                                                           | NIH AIDS Reagent #12249        |
| SIV <sub>mac239</sub> SpX ΔVpx | SIV Δvpx                                  | Molecular clone of SIV <sub>MAC239</sub> Δvpx proviral DNA                                                                                                                                                                                                                      | NIH AIDS Reagent #12252        |
| pMD2.G                         | VSV-G                                     | Pseudotype HIV-1 vectors with VSV Glycoprotein                                                                                                                                                                                                                                  | Addgene #12259                 |
| psPAX2                         | HIV-1 <i>gag-pol</i>                      | Encodes <i>gag</i> structural proteins and <i>pol</i> enzymes to generate virion particles                                                                                                                                                                                      | Addgene #12260                 |
| SIV3+                          | SIV <sub>MAC251</sub> <i>gag-pol/vpx</i>  | Production of SIV VLPs containing Vpx protein                                                                                                                                                                                                                                   | Gift from Dr. Andrea Cimorelli |
| SIV3+ Δvpx                     | SIV <sub>MAC251</sub> <i>gag-pol/Δvpx</i> | Production of SIV VLPs without Vpx protein.                                                                                                                                                                                                                                     | Gift from Dr. Andrea Cimorelli |
| SIV-Luc Δvpx Δvpr E-           | Transduction of primary CD4+ cells        | Two part SIV vector used to as control for expression of Vpx in transduced cells                                                                                                                                                                                                | Gift from Dr. Nathaniel Landau |
| SIV-Luc Δvpr E-                | Transduction of primary CD4+ cells        | Two part SIV vector used to express Vpx in transduced cells                                                                                                                                                                                                                     | Gift from Dr. Nathaniel Landau |
| pscALPS <i>gag-gfp/blasti</i>  | Lenti-gfp- <i>blasti</i>                  | SFFV promoter expresses <i>gag-gfp</i> fusion with CypA promoter driving blasticidin resistance gene                                                                                                                                                                            | Addgene #115803                |
| pscALPS <i>gfp/blasti</i>      | GFP reporter                              | SFFV promoter expresses non-fused <i>gfp</i> with CypA promoter driving blasticidin resistance gene                                                                                                                                                                             | Addgene #115804                |
| pscALPS <i>gag-gfp/vpx</i>     | Lenti-gfp- <i>vpx</i>                     | SFFV promoter expresses <i>gag-gfp</i> fusion with CypA promoter driving expression of SIV <sub>MAC251</sub> <i>vpx</i>                                                                                                                                                         | Addgene #115807                |
| pscALPS <i>gag-gfp/Δvpx</i>    | Lenti-gfp-Δvpx                            | SFFV promoter expresses <i>gag-gfp</i> fusion with no ORF after CypA promoter                                                                                                                                                                                                   | Addgene #115808                |
| pecALPS <i>gag-gfp/blasti</i>  | Lenti-gfp- <i>blasti</i>                  | EIF1a promoter expresses <i>gag-gfp</i> fusion and CypA promoter expresses blasticidin resistance gene                                                                                                                                                                          | Addgene #115805                |
| pkcALPS- <i>gag-gfp/blasti</i> | Lenti-gfp- <i>blasti</i>                  | TK promoter expresses <i>gag-gfp</i> fusion and CypA promoter expresses blasticidin resistance gene                                                                                                                                                                             | Addgene #115806                |
| HIV-1 LTR-gfp                  | HIV-1 LTR-gfp                             | HIV-1 LTR driven reporter vector that retains complete LTRs, <i>tat</i> , and <i>rev</i> , but has a frameshift mutation in <i>env</i> , an <i>ngfr</i> reporter gene in place of <i>nef</i> , and <i>gfp</i> in place of <i>gag</i> , <i>pol</i> , <i>vif</i> , and <i>vpr</i> | Addgene #115809                |

|                                                |                                   |                                                                                                                                                  |                 |
|------------------------------------------------|-----------------------------------|--------------------------------------------------------------------------------------------------------------------------------------------------|-----------------|
| pscALPS-SIV <sub>MAC251</sub> <i>vpx</i>       | Lentivector expressing <i>vpx</i> | Encodes codon optimized 3xFLAG- <i>Vpx</i> <sub>MAC251</sub> and puromycin resistance protein                                                    | Addgene #115810 |
| pscALPS SIV <sub>MND2</sub> <i>vpx</i>         | Lentivector expressing <i>vpx</i> | Encodes codon optimized 3xFLAG-SIV <sub>MND2</sub> <i>Vpx</i> (AY159322) and puromycin resistance protein                                        | Addgene #115811 |
| pscALPS-SIV <sub>RCM</sub> <i>vpx</i>          | Lentivector expressing <i>vpx</i> | Encodes codon optimized 3xFLAG-SIV <sub>RCM</sub> <i>Vpx</i> (AF349680) and puromycin resistance protein                                         | Addgene #115812 |
| pscALPS-SIV <sub>MNE</sub> <i>vpx</i>          | Lentivector expressing <i>vpx</i> | Encodes codon optimized 3xFLAG-SIV <sub>MNE</sub> <i>Vpx</i> (U79412) and puromycin resistance protein                                           | Addgene #115813 |
| pscALPS-SIV <sub>DRL</sub> <i>vpx</i>          | Lentivector expressing <i>vpx</i> | Encodes codon optimized 3xFLAG-SIV <sub>DRL</sub> <i>Vpx</i> (KM378563) and puromycin resistance protein                                         | Addgene #115814 |
| pscALPS-SIV <sub>AGI</sub> <i>vpx</i>          | Lentivector expressing <i>vpx</i> | Encodes codon optimized 3xFLAG-SIV <sub>AGI</sub> <i>Vpx</i> (HM803690) and puromycin resistance protein                                         | Addgene #115815 |
| pscALPS-HIV <sub>2ROD</sub> <i>vpx</i>         | Lentivector expressing <i>vpx</i> | Encodes codon optimized 3xFLAG-HIV <sub>2ROD</sub> <i>Vpx</i> (M15390) and puromycin resistance protein                                          | Addgene #115816 |
| pscALPS-SIV <sub>MND1</sub> <i>vpr</i>         | Lentivector expressing <i>vpr</i> | Encodes codon optimized 3xFLAG-SIV <sub>MND1</sub> <i>Vpr</i> (M27470) and puromycin resistance protein                                          | Addgene #115817 |
| pscALPS-SIV <sub>LST</sub> <i>vpr</i>          | Lentivector expressing <i>vpr</i> | Encodes codon optimized 3xFLAG-SIV <sub>LST</sub> <i>Vpr</i> (AF188116) and puromycin resistance protein                                         | Addgene #115818 |
| pscALPS-SIV <sub>AGM</sub> TAN1 <i>vpr</i>     | Lentivector expressing <i>vpr</i> | Encodes codon optimized 3xFLAG-SIV <sub>AGM</sub> <i>Vpr</i> (TAN1) (U58991) with repaired premature stop codon and puromycin resistance protein | Addgene #115819 |
| pscALPS-SIV <sub>TAL</sub> <i>vpr</i>          | Lentivector expressing <i>vpr</i> | Encodes codon optimized 3xFLAG-SIV <sub>TAL</sub> <i>Vpr</i> (AM182197) and puromycin resistance protein                                         | Addgene #115820 |
| pscALPS-SIV <sub>SYK</sub> <i>vpr</i>          | Lentivector expressing <i>vpr</i> | Encodes codon optimized 3xFLAG-SIV <sub>SYK</sub> <i>Vpr</i> (L06042) and puromycin resistance protein                                           | Addgene #115821 |
| pscALPS-SIV <sub>SAB</sub> 92018 <i>vpr</i>    | Lentivector expressing <i>vpr</i> | Encodes codon optimized 3xFLAG-SIV <sub>SAB</sub> <i>Vpr</i> (HQ378594) and puromycin resistance protein                                         | Addgene #115822 |
| pscALPS-SIV <sub>DEB</sub> <i>vpr</i>          | Lentivector expressing <i>vpr</i> | Encodes codon optimized 3xFLAG-SIV <sub>DEB</sub> <i>Vpr</i> (FJ919724) and puromycin resistance protein                                         | Addgene #115823 |
| pscALPS-SIV <sub>ASC</sub> <i>vpr</i>          | Lentivector expressing <i>vpr</i> | Encodes codon optimized 3xFLAG-SIV <sub>ASC</sub> <i>Vpr</i> (KJ461715) and puromycin resistance protein                                         | Addgene #115824 |
| pscALPS-SIV <sub>AGM</sub> VER9063 <i>vpr</i>  | Lentivector expressing <i>vpr</i> | Encodes codon optimized 3xFLAG-SIV <sub>AGM</sub> <i>Vpr</i> (Ver 9063) (L40990) and Puro resistance marker                                      | Addgene #115825 |
| pscALPS-SIV <sub>AGM</sub> VERAGM 3 <i>vpr</i> | Lentivector expressing <i>vpr</i> | Encodes codon optimized 3xFLAG-SIV <sub>AGM</sub> <i>Vpr</i> (Ver AGM3) (M30931) and puromycin resistance protein                                | Addgene #115826 |
| pscALPS-SIV <sub>GRV</sub> <i>vpr</i>          | Lentivector expressing <i>vpr</i> | Encodes codon optimized 3xFLAG-SIV <sub>GRV</sub> <i>Vpr</i> (M66437) and puromycin resistance protein                                           | Addgene #115827 |
| pscALPS-SIV <sub>AGM</sub> MAL <i>vpr</i>      | Lentivector expressing <i>vpr</i> | Encodes codon optimized 3xFLAG-SIV <sub>AGM</sub> <i>Vpr</i> (MAL_ZMB) (LC114462) and puromycin resistance protein                               | Addgene #115828 |
| pscALPS-SIV <sub>DEN</sub> <i>vpr</i>          | Lentivector expressing <i>vpr</i> | Encodes codon optimized 3xFLAG SIV <sub>DEN</sub> <i>Vpr</i> (AJ580407) and puromycin resistance protein                                         | Addgene #115829 |

|                                                |                                  |                                                                                                                                                       |                 |
|------------------------------------------------|----------------------------------|-------------------------------------------------------------------------------------------------------------------------------------------------------|-----------------|
| pscALPS-SIV <sub>G<sub>SN</sub>CN71</sub> vpr  | Lentivector expressing vpx       | Encodes codon optimized 3xFLAG SIV <sub>G<sub>SN</sub>CN71</sub> Vpr (AF468658) and puromycin resistance protein                                      | Addgene #115830 |
| pscALPS-SIV <sub>G<sub>SN</sub>CN166</sub> vpr | Lentivector expressing vpr       | Encodes codon optimized 3xFLAG SIV <sub>G<sub>SN</sub>CN166</sub> Vpr (AF468659) and puromycin resistance protein                                     | Addgene #115831 |
| pscALPS-SIV <sub>SUN</sub> K08 vpr             | Lentivector expressing vpr       | Encodes codon optimized 3xFLAG-SIV <sub>SUN</sub> Vpr (FR751162) and puromycin resistance protein                                                     | Addgene #115832 |
| pscALPS-SIV <sub>CPZ</sub> TAN3 vpr            | Lentivector expressing vpr       | Encodes codon optimized 3xFLAG-SIV <sub>CPZ-TAN3</sub> Vpr (DQ374658) and puromycin resistance protein                                                | Addgene #115833 |
| pscALPS-SIV <sub>CPZ</sub> LB7 vpr             | Lentivector expressing vpr       | Encodes codon optimized 3xFLAG-SIV <sub>CPZ-LB7</sub> Vpr (DQ373064) and puromycin resistance protein                                                 | Addgene #115834 |
| pscALPS-SIV <sub>G<sub>OR</sub></sub> -vpr     | Lentivector expressing vpr       | Encodes codon optimized 3xFLAG-SIV <sub>G<sub>OR</sub></sub> Vpr (FJ424871) and puromycin resistance protein                                          | Addgene #115835 |
| pscALPS-HIV-1 Group O-vpr                      | Lentivector expressing vpr       | Encodes codon optimized 3xFLAG-HIV1 Group O Vpr (L20571) and puromycin resistance protein                                                             | Addgene #115836 |
| pscALPS-HIV-1 Group P-vpr                      | Lentivector expressing vpr       | Encodes codon optimized 3xFLAG-HIV1 Group P Vpr (HQ179987) and puromycin resistance protein                                                           | Addgene #115837 |
| pscALPS-SIV <sub>RCM</sub> -vpr                | Lentivector expressing vpr       | Encodes codon optimized 3xFLAG-SIV <sub>RCM</sub> Vpr (HM803689) and puromycin resistance protein                                                     | Addgene #115838 |
| pscALPS-SIV <sub>WRC</sub> -vpr                | Lentivector expressing vpr       | Encodes codon optimized 3xFLAG-SIV <sub>WRC</sub> Vpr (AM713177) and puromycin resistance protein                                                     | Addgene #115839 |
| pscALPS-SIV <sub>COL</sub> BWC01 vpr           | Lentivector expressing vpr       | Encodes codon optimized 3xFLAG-SIV <sub>COL</sub> Vpr (KF214240) and puromycin resistance protein                                                     | Addgene #115840 |
| pscALPS-SIV <sub>MUS2</sub> 1246-vpr           | Lentivector expressing vpr       | Encodes codon optimized 3xFLAG-SIV <sub>MUS2</sub> 1246 Vpr (EF070329) and puromycin resistance protein                                               | Addgene #115841 |
| pcDNA3.1 FLAG-SIV <sub>MAC</sub> 251-vpx       | Expression plasmid               | Encodes codon optimized FLAG tagged SIV <sub>MAC</sub> 251-Vpx                                                                                        | Addgene #115842 |
| pcDNA3.1 FLAG-SIV <sub>MAC</sub> 251-vpx-Q76A  | Expression plasmid               | Encodes codon optimized FLAG tagged SIV <sub>MAC</sub> 251-Vpx-Q76A mutant                                                                            | Addgene #115843 |
| pcDNA3.1 FLAG-SIV <sub>RCM</sub> -vpx          | Expression plasmid               | Encodes codon optimized FLAG tagged SIV <sub>RCM</sub> -Vpx                                                                                           | Addgene #115844 |
| pcDNA3.1 HA-FAM208A                            | Expression plasmid               | Encodes codon optimized HA tagged FAM208A                                                                                                             | Addgene #115845 |
| pAPM-D4-miR30-L1221                            | Lentivector luciferase knockdown | SFFV promoter expressing puromycin resistance protein and miR30-shRNA target site: 5'-CTTGTCGATGAGAGCGTTTGT-3'; negative control for other knockdowns | Addgene #115846 |
| pAPM-D4 miR30-HDAC1 ts1                        | Lentivector HDAC1 knockdown      | SFFV promoter expressing puromycin resistance protein and miR30-shRNA target site: 5'-TATGAGTCATGCGGATTTCG-3'                                         | Addgene #115847 |
| pAPM-D4 miR30-HDAC1                            | Lentivector HDAC1                | SFFV promoter expressing puromycin resistance protein and miR30-shRNA target site: 5'-TAAGAACGGGAAGAATGGG-3'                                          | Addgene #115848 |

|                                |                                    |                                                                                                                 |                    |
|--------------------------------|------------------------------------|-----------------------------------------------------------------------------------------------------------------|--------------------|
| ts2                            | knockdown                          |                                                                                                                 |                    |
| pAPM-D4<br>miR30-HDAC1<br>ts3  | Lentivector<br>HDAC1<br>knockdown  | SFFV promoter expressing puromycin resistance protein and<br>miR30-shRNA target site: 5'-TTAATGTAGTCATCGCTGT-3' | Addgene<br>#115849 |
| pAPM-D4<br>miR30-AGO1 ts1      | Lentivector AGO1<br>knockdown      | SFFV promoter expressing puromycin resistance protein and<br>miR30-shRNA target site: 5'-TTCTGCTTGAATACTGTG-3'  | Addgene<br>#115850 |
| pAPM-D4<br>miR30-AGO1 ts2      | Lentivector AGO1<br>knockdown      | SFFV promoter expressing puromycin resistance protein and<br>miR30-shRNA target site: 5'-TGATATCAGAGATTTCTGG-3' | Addgene<br>#115851 |
| pAPM-D4<br>miR30-AGO1 ts3      | Lentivector AGO1<br>knockdown      | SFFV promoter expressing puromycin resistance protein and<br>miR30-shRNA target site: 5'-TTGACATTGATCTTGAGGC-3' | Addgene<br>#115852 |
| pAPM-D4<br>miR30-AGO2 ts1      | Lentivector AGO2<br>knockdown      | SFFV promoter expressing puromycin resistance protein and<br>miR30-shRNA target site: 5'-TAATACATCTTTGTCCTGC-3' | Addgene<br>#115853 |
| pAPM-D4<br>miR30-AGO2 ts2      | Lentivector AGO2<br>knockdown      | SFFV promoter expressing puromycin resistance protein and<br>miR30-shRNA target site: 5'-TCATCTGCACGCACTGCGT-3' | Addgene<br>#115854 |
| pAPM-D4<br>miR30-AGO2 ts3      | Lentivector AGO2<br>knockdown      | SFFV promoter expressing puromycin resistance protein and<br>miR30-shRNA target site: 5'-TTGCTAATCTCTTCTTGCC-3' | Addgene<br>#115855 |
| pAPM-D4<br>miR30-AGO3 ts1      | Lentivector AGO3<br>knockdown      | SFFV promoter expressing puromycin resistance protein and<br>miR30-shRNA target site: 5'-TGACTTGAACACATTGTGT-3' | Addgene<br>#115856 |
| pAPM-D4<br>miR30-AGO3 ts2      | Lentivector AGO3<br>knockdown      | SFFV promoter expressing puromycin resistance protein and<br>miR30-shRNA target site: 5'-TCTGAACTACAATGTAGGT-3' | Addgene<br>#115857 |
| pAPM-D4<br>miR30-AGO3 ts3      | Lentivector AGO3<br>knockdown      | SFFV promoter expressing puromycin resistance protein and<br>miR30-shRNA target site: 5'-TAGCTTCTTGATACATCGT-3' | Addgene<br>#115858 |
| pAPM-D4<br>miR30-SETDB1<br>ts1 | Lentivector<br>SETDB1<br>knockdown | SFFV promoter expressing puromycin resistance protein and<br>miR30-shRNA target site: 5'-TTCGCATGCTGACTATCAG-3' | Addgene<br>#115859 |
| pAPM-D4<br>miR30-SETDB1<br>ts2 | Lentivector<br>SETDB1<br>knockdown | SFFV promoter expressing puromycin resistance protein and<br>miR30-shRNA target site: 5'-ACACAATCCATCTTCTCCA-3' | Addgene<br>#115860 |
| pAPM-D4<br>miR30-SETDB1<br>ts3 | Lentivector<br>SETDB1<br>knockdown | SFFV promoter expressing puromycin resistance protein and<br>miR30-shRNA target site: 5'-TTGTTGTCAAATTTACCT-3'  | Addgene<br>#115861 |
| pAPM-D4<br>miR30-TRIM28<br>ts1 | Lentivector<br>TRIM28<br>knockdown | SFFV promoter expressing puromycin resistance protein and<br>miR30-shRNA target site: 5'-AAGGTTGTAGTCCTCAGTG-3' | Addgene<br>#115862 |
| pAPM-D4<br>miR30-TRIM28<br>ts2 | Lentivector<br>TRIM28<br>knockdown | SFFV promoter expressing puromycin resistance protein and<br>miR30-shRNA target site: 5'-TCAATAACAATAAGGTTGT-3' | Addgene<br>#115863 |
| pAPM-D4<br>miR30-TRIM28<br>ts3 | Lentivector<br>TRIM28<br>knockdown | SFFV promoter expressing puromycin resistance protein and<br>miR30-shRNA target site: 5'-TGAGTAGGGATCATCTCCT-3' | Addgene<br>#115864 |
| pAPM-D4<br>miR30-DNMT3a<br>ts1 | Lentivector<br>DNMT3a<br>knockdown | SFFV promoter expressing puromycin resistance protein and<br>miR30-shRNA target site: 5'-TAATCTCCTTGACCTTGGG-3' | Addgene<br>#115865 |
| pAPM-D4<br>miR30-DNMT3a<br>ts2 | Lentivector<br>DNMT3a<br>knockdown | SFFV promoter expressing puromycin resistance protein and<br>miR30-shRNA target site: 5'-TATCATTCACAGTGGATGC-3' | Addgene<br>#115866 |

|                                   |                                      |                                                                                                                                                                                        |                    |
|-----------------------------------|--------------------------------------|----------------------------------------------------------------------------------------------------------------------------------------------------------------------------------------|--------------------|
| pAPM-D4<br>miR30-DNMT3a<br>ts3    | Lentivector<br>DNMT3a<br>knockdown   | SFFV promoter expressing puromycin resistance protein and<br>miR30-shRNA target site: 5'-AGAACTCAAAGAAGAGCCG-3'                                                                        | Addgene<br>#115867 |
| pAPM-D4<br>miR30-PIWIL2<br>ts1    | Lentivector<br>PIWIL2<br>knockdown   | SFFV promoter expressing puromycin resistance protein and<br>miR30-shRNA target site: 5'-CGAACATTGACAACCTGGG-3'                                                                        | Addgene<br>#115868 |
| pAPM-D4<br>miR30-PIWIL2<br>ts2    | Lentivector<br>PIWIL2<br>knockdown   | SFFV promoter expressing puromycin resistance protein and<br>miR30-shRNA target site: 5'-AGCAGACAAGCCTCGACCT-3'                                                                        | Addgene<br>#115869 |
| pAPM-D4<br>miR30-PIWIL2<br>ts3    | Lentivector<br>PIWIL2<br>knockdown   | SFFV promoter expressing puromycin resistance protein and<br>miR30-shRNA target site: 5'-AGATTAGTACTGATTTTCT-3'                                                                        | Addgene<br>#115870 |
| pAPM-D4<br>miR30-FAM208A<br>ts1   | Lentivector<br>FAM208A<br>knockdown  | SFFV promoter expressing puromycin resistance protein and<br>miR30-shRNA target site: 5'-TTCTTCTACTGGTTCCCGG-3'                                                                        | Addgene<br>#115871 |
| pAPM-D4<br>miR30-FAM208A<br>ts2   | Lentivector<br>FAM208A<br>knockdown  | SFFV promoter expressing puromycin resistance protein and<br>miR30-shRNA target site: 5'-TGAATTGCTGTTCTCTCTCT-3'<br><br>Exhibited best KD activity and utilized in further experiments | Addgene<br>#115872 |
| pAPM-D4<br>miR30-FAM208A<br>ts3   | Lentivector<br>FAM208A<br>knockdown  | SFFV promoter expressing puromycin resistance protein and<br>miR30-shRNA target site: 5'-ATCTTAGCACCAGAATCGT-3'                                                                        | Addgene<br>#115873 |
| pAPM-D4<br>miR30-<br>MPHOSPH8 ts1 | Lentivector<br>MPHOSPH8<br>knockdown | SFFV promoter expressing puromycin resistance protein and<br>miR30-shRNA target site: 5'-AAATCTCTTATTTACCCT-3'                                                                         | Addgene<br>#115874 |
| pAPM-D4<br>miR30-<br>MPHOSPH8 ts2 | Lentivector<br>MPHOSPH8<br>knockdown | SFFV promoter expressing puromycin resistance protein and<br>miR30-shRNA target site: 5'-TTGCTTCTGTCTTGATTCC-3'<br><br>Exhibited best KD activity and utilized in further experiments  | Addgene<br>#115875 |
| pAPM-D4<br>miR30-<br>MPHOSPH8 ts3 | Lentivector<br>MPHOSPH8<br>knockdown | SFFV promoter expressing puromycin resistance protein and<br>miR30-shRNA target site: 5'-TTCTCTTCTCTGCTGTCGG-3'                                                                        | Addgene<br>#115876 |
| pAPM-D4<br>miR30-PPHLN1<br>ts1    | Lentivector<br>PPHLN1<br>knockdown   | SFFV promoter expressing puromycin resistance protein and<br>miR30-shRNA target site: 5'-TCATCTGATTTCTCTAGCT-3'                                                                        | Addgene<br>#115877 |
| pAPM-D4<br>miR30-PPHLN1<br>ts2    | Lentivector<br>PPHLN1<br>knockdown   | SFFV promoter expressing puromycin resistance protein and<br>miR30-shRNA target site: 5'-TTCATATTCATATCGTCCC-3'<br><br>Exhibited best KD activity and utilized in further experiments  | Addgene<br>#115878 |
| pAPM-D4<br>miR30-PPHLN1<br>ts3    | Lentivector<br>PPHLN1<br>knockdown   | SFFV promoter expressing puromycin resistance protein and<br>miR30-shRNA target site: 5'-TGAGTTCTTCAACACACCG-3'                                                                        | Addgene<br>#115879 |
| pAPM-D4<br>miR30-SUV39h1<br>ts1   | Lentivector<br>SUV39h1<br>knockdown  | SFFV promoter expressing puromycin resistance protein and<br>miR30-shRNA target site: 5'-TGAGGATACGCACACACTT-3'                                                                        | Addgene<br>#115880 |
| pAPM-D4<br>miR30-SUV39h1<br>ts2   | Lentivector<br>SUV39h1<br>knockdown  | SFFV promoter expressing puromycin resistance protein and<br>miR30-shRNA target site: 5'-AGAGCAGGTAGGAGCAGGT-3'                                                                        | Addgene<br>#115881 |
| pAPM-D4<br>miR30-SUV39h1<br>ts3   | Lentivector<br>SUV39h1<br>knockdown  | SFFV promoter expressing puromycin resistance protein and<br>miR30-shRNA target site: 5'-CATTCTCTACAGTGATGCG-3'                                                                        | Addgene<br>#115882 |

|                                 |                                     |                                                                                                                                                                                       |                    |
|---------------------------------|-------------------------------------|---------------------------------------------------------------------------------------------------------------------------------------------------------------------------------------|--------------------|
| pAPM-D4<br>miR30-SUV39h2<br>ts1 | Lentivector<br>SUV39h2<br>knockdown | SFFV promoter expressing puromycin resistance protein and<br>miR30-shRNA target site: 5'-TCATCAGACTCATAGTCCA-3'                                                                       | Addgene<br>#115883 |
| pAPM-D4<br>miR30-SUV39h2<br>ts2 | Lentivector<br>SUV39h2<br>knockdown | SFFV promoter expressing puromycin resistance protein and<br>miR30-shRNA target site: 5'-TAAATTTCTTTATCATTGA-3'                                                                       | Addgene<br>#115884 |
| pAPM-D4<br>miR30-SUV39h2<br>ts3 | Lentivector<br>SUV39h2<br>knockdown | SFFV promoter expressing puromycin resistance protein and<br>miR30-shRNA target site: 5'-ACATTATCAGCTTAACGCT-3'                                                                       | Addgene<br>#115885 |
| pAPM-D4<br>miR30-MORC2<br>ts1   | Lentivector<br>MORC2<br>knockdown   | SFFV promoter expressing puromycin resistance protein and<br>miR30-shRNA target site: 5'-TGAGATTGAAGATGATCAC-3'<br><br>Exhibited best KD activity and utilized in further experiments | Addgene<br>#115886 |
| pAPM-D4<br>miR30-MORC2<br>ts2   | Lentivector<br>MORC2<br>knockdown   | SFFV promoter expressing puromycin resistance protein and<br>miR30-shRNA target site: 5'-TTTTCCACAGAACTCAGCT-3'                                                                       | Addgene<br>#115887 |
| pAPM-D4<br>miR30-MORC2<br>ts3   | Lentivector<br>MORC2<br>knockdown   | SFFV promoter expressing puromycin resistance protein and<br>miR30-shRNA target site: 5'-TGTCTGTGACAGGTTCCCG-3'                                                                       | Addgene<br>#115888 |
| pAPM-miR30-<br>DCAF1            | Lentivector<br>DCAF1<br>knockdown   | SFFV promoter expressing puromycin resistance protein and<br>miR30-shRNA target site: 5'-AGCACTTCAGATTATCATCAAT-<br>3'                                                                | Addgene<br>#115889 |
